# Supplementary material
Source: HighWire-hosted journal article supplement (https://ard.bmj.com/highwire/filestream/202444/field_highwire_adjunct_files/0/66589webonlyapp.pdf)
Supplement: 66589webonlyapp.pdf [file 66589webonlyapp.pdf]

**Table 1** Clinical characteristic of the patient populations

|                           | Oligo articular JIA |                | Poly articular JIA |               | Systemic JIA  |                |
|---------------------------|---------------------|----------------|--------------------|---------------|---------------|----------------|
|                           | plasma              | SF             | plasma             | SF            | plasma        | SF             |
| m/f                       | 21/9                | 16/3           | 13/7               | 7/2           | 8/7           | 4/2            |
| Age (years)               | 9.3 (3.0-15.1)      | 9.2 (2.1-17)   | 9.5 (2.1-14.8)     | 10 (3.6-17.1) | 9.7(3.6-17.5) | 9.6 (7.7-13.4) |
| Disease duration          | 5.9 (0.4-14.0)      | 4.7 (0.4-14.0) | 4.7 (0.2-11.0)     | 4.4 (0.8-8.5) | 2.7 (0.3-7.0) | 5.9 (0.2-10.0) |
| Active/remission          | 20/10               | 19/0           | 13/7               | 9             | 8/7           | 6              |
| ESR (mm/hr)               | 13.2 (2-55)         | 31.2 (7-104)   | 13.9 (5-47)        | 43.0 (7-80)   | 46.7 (5-171)  | 61.1 (1-171)   |
| CRP (mg/L)                | 22.9 (<1-90)        | 34.1 (3-90)    | 29.5 (3-110)       | 35.2 (15-95)  | 45.0 (2-111)  | 33.0 (18-70)   |
| ANA positive <sup>1</sup> | 7 (23%)             | 13 (68%)       | 8 (40%)            | 2 (22%)       | 2 (22%)       | 0 (0%)         |
| RF positive <sup>2</sup>  | 0 (0%)              | 0 (0%)         | 3 (15%)            | 1 (11%)       | 0 (0%)        | 0 (0%)         |
| NSAID                     | 24 (80%)            | 18 (95%)       | 19 (95%)           | 8 (89%)       | 14 (93%)      | 6 (100%)       |
| MTX                       | 12 (40%)            | 8 (42%)        | 11 (55%)           | 7 (78%)       | 8 (53%)       | 5 (83%)        |
| Corticosteroids           | 1 (3%)              | 1 (5%)         | 2 (10%)            | 2 (22%)       | 4 (27%)       | 4 (67%)        |
| Anti TNF $\alpha$         | 0 (0%)              | 0 (0%)         | 3 (15%)            | 1 (11%)       | 2 (13%)       | 2 (33%)        |

ESR = erythrocyte sedimentation rate, CRP = C-reactive protein, ANA = antinuclear antibody; RF = rheumatoid factor; NSAID = non steroid anti inflammatory drugs; MTX = methotrexate; 1 Determined by indirect immunofluorescence on Hep-2 cells; 2 Determined by IgM ELISA
